# Supplementary material for: One-Step Synthesis of a Binder-Free, Stable, and High-Performance Electrode; Cu-O|Cu3P Heterostructure for the Electrocatalytic Methanol Oxidation Reaction (MOR)
Source: MDPI journal article supplement (doi:10.3390/nano13071234), 2023-03-30
Supplement: s1 [file s1]

Supplementary Materials

# One-Step Synthesis of a Binder-Free, Stable, and High Performance Electrode; Cu-O|Cu<sub>3</sub>P Heterostructure for the Electrocatalytic Methanol Oxidation Reaction (MOR)

Alina Yarmolenko <sup>†</sup>, Bibhudatta Malik <sup>†</sup>, Efrat Shawat Avraham <sup>†</sup> and Gilbert Daniel Nessim <sup>\*</sup>

The Department of Chemistry and Institute of Nanotechnology, Bar-Ilan University, Ramat Gan 52900, Israel

<sup>\*</sup> Correspondence: gdnessim@biu.ac.il

<sup>†</sup> These authors contributed equally to this work.

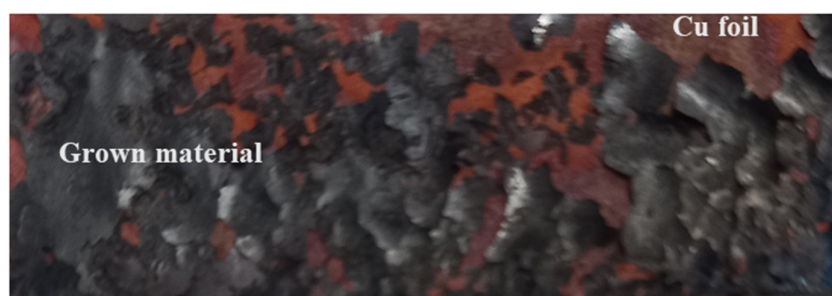

**Figure S1.** The optical photograph represents the Cu foil heated at 500 °C in air. The material formed with it are found to be ruptured and thus it is not suitable to act as a binder free electrode.

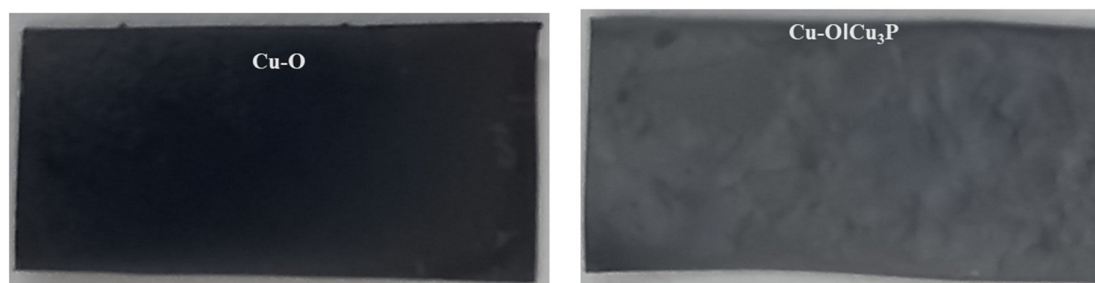

**Figure S2.** Left image stands for mixed Cu oxides (Cu-O) grown over Cu foil (heated in air at 350 °C) and the right one denotes the optical image of Cu-O|Cu<sub>3</sub>P that grown over Cu foil. In both cases the front and rear sides are fully converted to Cu based oxides and phosphide.

**Table S1.** represent the deconvoluted compositions of elements and C 1s arises from the substrate (carbon tape) while measuring the XPS.

| Elements | Atomic percentage |
|----------|-------------------|
| Cu 2p    | 12.66             |
| P 2p     | 15.56             |
| O 1s     | 63.48             |
| C 1s     | 8.3               |

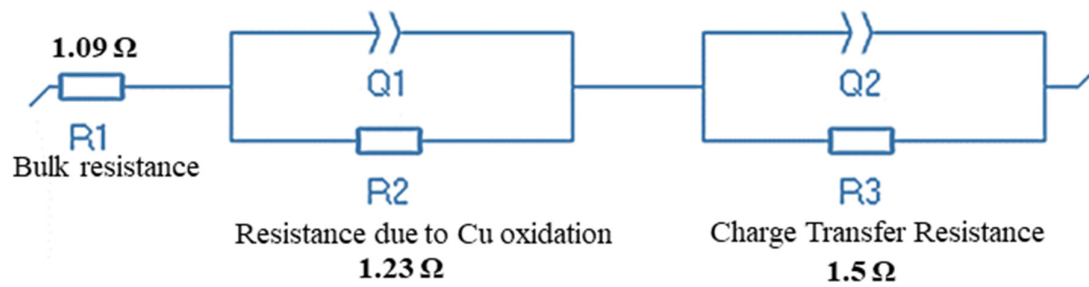

Figure S3. The equivalent circuit diagram fitted from the Nyquist data of Cu-O/Cu<sub>3</sub>P.

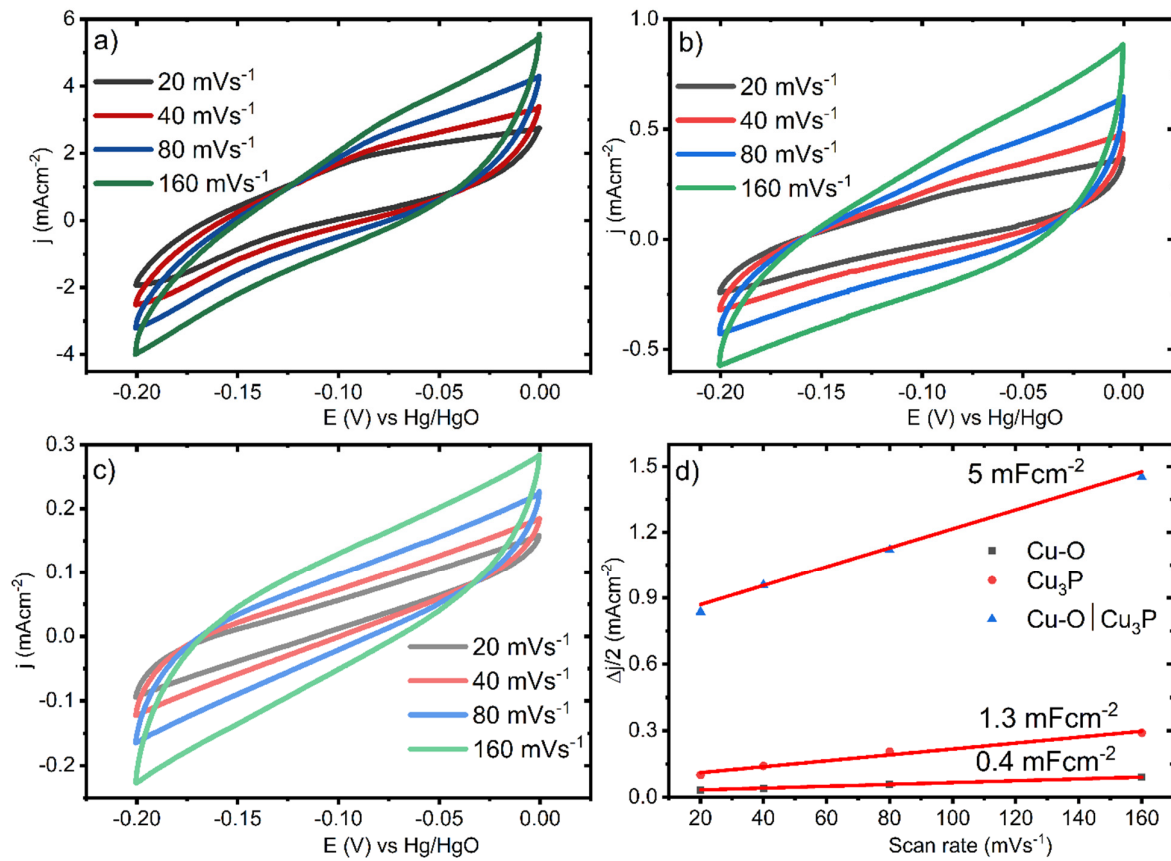

Figure S4. The cyclic voltammograms carried out at different sweep rates (a) Cu-O, (b) Cu<sub>3</sub>P and (c) Cu-O/Cu<sub>3</sub>P and (d) the double layer capacitance plots of three different catalysts.

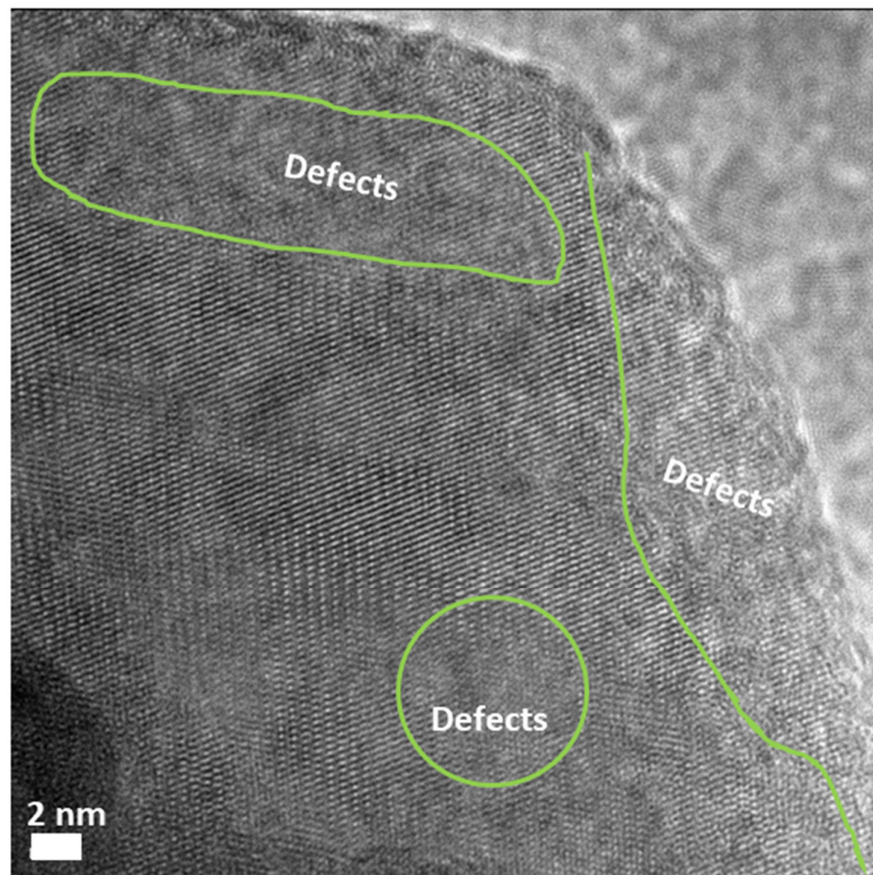

**Figure S5.** The HR-TEM of Cu-O|Cu<sub>3</sub>P demonstrates the defects and randomness of the planes.

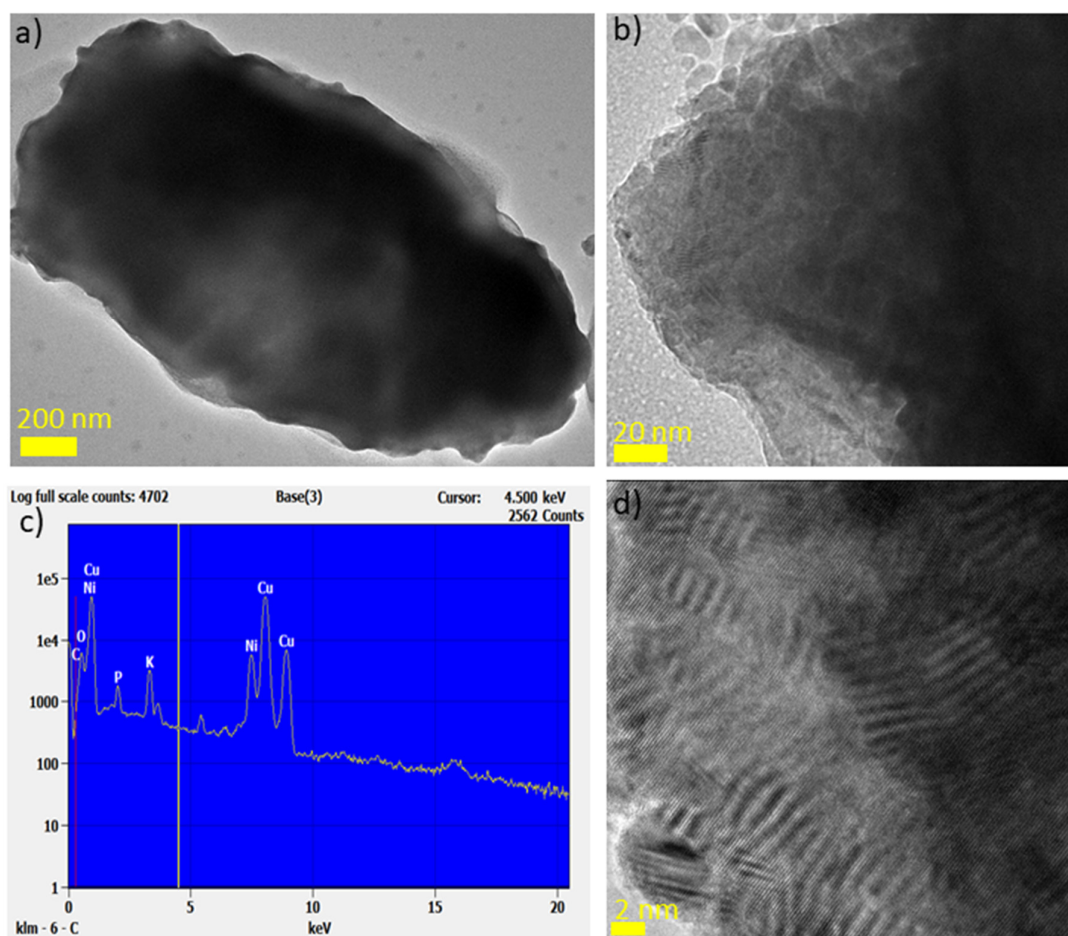

**Figure S6.** (a) the morphology of Cu-O/Cu<sub>3</sub>P after MOR, (b) the high-resolution image after MOR, (c) demonstrates the disorderness of the planes after MOR and (d) EDS of the post MOR sample to notice the presence of various elements.
